CORRECTION

## Correction: Predicting hypertension and identifying most important factors among married women in Bangladesh using machine learning approach

Novel Chandra Das, Probir Kumar Ghosh, Md. Alamgir Hossain, Uddip Acharjee Shuvo, Nipa Rani Talukder, Fatema Khatun, Mohammad Ziaul Islam Chowdhury

The Introduction heading has been misspelled. The correct spelling is Introduction.

### Reference

1. Das NC, Ghosh PK, Hossain MA, Shuvo UA, Talukder NR, Khatun F, et al. Predicting hypertension and identifying most important factors among married women in Bangladesh using machine learning approach. PLoS One. 2025;20(10):e0335442. <https://doi.org/10.1371/journal.pone.0335442> PMID: [41166313](https://pubmed.ncbi.nlm.nih.gov/41166313/)

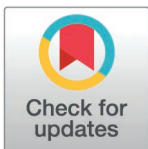

### OPEN ACCESS

**Citation:** Das NC, Ghosh PK, Hossain MA, Shuvo UA, Talukder NR, Khatun F, et al. (2026) Correction: Predicting hypertension and identifying most important factors among married women in Bangladesh using machine learning approach. PLoS One 21(1): e0340871. <https://doi.org/10.1371/journal.pone.0340871>

**Published:** January 9, 2026

**Copyright:** © 2026 Das et al. This is an open access article distributed under the terms of the [Creative Commons Attribution License](https://creativecommons.org/licenses/by/4.0/), which permits unrestricted use, distribution, and reproduction in any medium, provided the original author and source are credited.
